# Supplementary material for: Alcids ‘fly’ at efficient Strouhal numbers in both air and water but vary stroke velocity and angle
Source: eLife. 2020 Jun 30;9:e55774. doi: 10.7554/eLife.55774 (PMC7332295; doi:10.7554/eLife.55774)
Supplement: Figure 2—source data 1. [file elife-55774-fig2-data1.xlsx]

## Sheet: data
Species	Fluid	run	tag	type	velocityReference	NumberofWingbeats	strouhal	strouhal_sd	st_lowerBound	st_upperBound
Common murre	Water	murre110R17001910xypts	Common murreA	Horizontal Swimming	Fluid	4	0.152169	0.0248051	0.127363	0.176974
Common murre	Water	murre110R17501997xypts	Common murreB	Horizontal Swimming	Fluid	4	0.194294	0.0328896	0.161404	0.227183
Common murre	Water	murre24R1307513260xypts	Common murreC	Horizontal Swimming	Fluid	3	0.193392	0.0064533	0.186939	0.199846
Common murre	Water	murre24R54855640xypts	Common murreD	Horizontal Swimming	Fluid	2	0.201269	0.0266071	0.174661	0.227876
Common murre	Water	murre29L1421014365xypts	Common murreE	Horizontal Swimming	Fluid	2	0.170569	0.021536	0.149033	0.192105
Common murre	Water	murre29R1194012170xypts	Common murreF	Horizontal Swimming	Fluid	3	0.167462	0.0353085	0.132154	0.20277
Common murre	Water	murre30L20286xypts	Common murreG	Horizontal Swimming	Fluid	4	0.165073	0.0264253	0.138647	0.191498
Horned puffin	Water	horned100R645910xypts	Horned puffinA	Horizontal Swimming	Fluid	4	0.115079	0.0314117	0.0836676	0.146491
Horned puffin	Water	horned113L2333523585xypts	Horned puffinB	Horizontal Swimming	Fluid	3	0.138231	0.0294166	0.108814	0.167648
Horned puffin	Water	horned14826502905xypts	Horned puffinC	Horizontal Swimming	Fluid	2	0.125703	0.00436421	0.121339	0.130067
Horned puffin	Water	horned14872107615xypts	Horned puffinD	Horizontal Swimming	Fluid	4	0.141479	0.0347264	0.106753	0.176206
Horned puffin	Water	horned23R2480	Horned puffinE	Horizontal Swimming	Fluid	4	0.146906	0.0619269	0.0849796	0.208833
Horned puffin	Water	horned88R23402550movingright	Horned puffinF	Horizontal Swimming	Fluid	2	0.137488	0.0301122	0.107376	0.1676
Pigeon guillemot	Water	pigeon100R12401490xypts	Pigeon guillemotA	Horizontal Swimming	Fluid	5	0.142657	0.0176076	0.125049	0.160264
Pigeon guillemot	Water	pigeon125L410696xypts	Pigeon guillemotB	Horizontal Swimming	Fluid	5	0.156334	0.0368296	0.119505	0.193164
Pigeon guillemot	Water	pigeon29R11901440xypts	Pigeon guillemotC	Horizontal Swimming	Fluid	5	0.157865	0.0328944	0.12497	0.190759
Pigeon guillemot	Water	pigeon43R170395xypts	Pigeon guillemotD	Horizontal Swimming	Fluid	4	0.13962	0.02193	0.11769	0.16155
Pigeon guillemot	Water	pigeon44R9701200xypts	Pigeon guillemotE	Horizontal Swimming	Fluid	5	0.141328	0.0171851	0.124143	0.158513
Tufted puffin	Water	tufted1481177512000xypts	Tufted puffinA	Horizontal Swimming	Fluid	3	0.188457	0.108278	0.0801784	0.296735
Tufted puffin	Water	tufted14935103800xypts	Tufted puffinB	Horizontal Swimming	Fluid	4	0.140626	0.0193543	0.121272	0.159981
Tufted puffin	Water	tufted20L1136011670xypts	Tufted puffinC	Horizontal Swimming	Fluid	3	0.13237	0.0823874	0.0499826	0.214757
Tufted puffin	Water	tufted20L83108547xypts	Tufted puffinD	Horizontal Swimming	Fluid	4	0.15131	0.00559256	0.145717	0.156903
Tufted puffin	Water	tufted42R54605830xypts	Tufted puffinE	Horizontal Swimming	Fluid	3	0.143598	0.0378903	0.105708	0.181489
Tufted puffin	Water	tufted95L235570xypts	Tufted puffinF	Horizontal Swimming	Fluid	5	0.121169	0.0198548	0.101314	0.141024
Common murre	Water	murre124L3005	Common murreH	Descending Swimming	Fluid	6	0.25214	0.0223415	0.229798	0.274481
Common murre	Water	muure96R11170	Common murreI	Descending Swimming	Fluid	3	0.236772	0.018821	0.217951	0.255593
Horned puffin	Water	horned_100L_15605	Horned puffinG	Descending Swimming	Fluid	1	0.252811	0	0.252811	0.252811
Horned puffin	Water	horned133R12625	Horned puffinH	Descending Swimming	Fluid	3	0.196736	0.0145493	0.182186	0.211285
Horned puffin	Water	horned91R195	Horned puffinI	Descending Swimming	Fluid	4	0.184563	0.0402428	0.144321	0.224806
Pigeon guillemot	Water	pigeon136L4167	Pigeon guillemotF	Descending Swimming	Fluid	2	0.232217	0.0493933	0.182824	0.281611
Pigeon guillemot	Water	pigeon136R45865	Pigeon guillemotG	Descending Swimming	Fluid	3	0.349373	0.0430316	0.306341	0.392404
Pigeon guillemot	Water	pigeon28L3484	Pigeon guillemotH	Descending Swimming	Fluid	3	0.300732	0.0368169	0.263915	0.337549
Tufted puffin	Water	tuftedpuffin120R7358	Tufted puffinG	Descending Swimming	Fluid	2	0.251489	0.0141603	0.237329	0.26565
Tufted puffin	Water	tuftedpuffin136R44648	Tufted puffinH	Descending Swimming	Fluid	5	0.318286	0.0163004	0.301986	0.334587
Tufted puffin	Water	tuftedpuffin51R2425	Tufted puffinI	Descending Swimming	Fluid	3	0.286555	0.0192944	0.267261	0.30585
Common murre	Air	Dz100_064_eighthbird	Common murreJ	Aerial Flight	Fluid	14	0.195427		0.137005	0.25385
Common murre	Air	Dz100_064_firstbird	Common murreK	Aerial Flight	Fluid	45	0.176887		0.124007	0.229767
Common murre	Air	Dz100_064_secondbird	Common murreL	Aerial Flight	Fluid	43	0.16944		0.118786	0.220094
Common murre	Air	Dz100_064_seventhbird	Common murreM	Aerial Flight	Fluid	13	0.183302		0.128504	0.238099
Common murre	Air	Dz100_064_thirdfrontbird	Common murreN	Aerial Flight	Fluid	19	0.18152		0.127255	0.235785
Horned puffin	Air	Dz91_079	Horned puffinJ	Aerial Flight	Fluid	12	0.151721		0.129847	0.173595
Horned puffin	Air	Dz91_081	Horned puffinK	Aerial Flight	Fluid	24	0.182063		0.155814	0.208311
Horned puffin	Air	Dz91_082	Horned puffinL	Aerial Flight	Fluid	26	0.238307		0.20395	0.272664
Horned puffin	Air	Dz91_0119	Horned puffinM	Aerial Flight	Fluid	45	0.211444		0.180959	0.241928
Pigeon guillemot	Air	pigeon_perp1	Pigeon guillemotI	Aerial Flight	Fluid	7	0.237817		0.203531	0.272104
Pigeon guillemot	Air	pigeon_perp4	Pigeon guillemotJ	Aerial Flight	Fluid	4	0.209565		0.179352	0.239778
Pigeon guillemot	Air	pigeon_perp3first	Pigeon guillemotK	Aerial Flight	Fluid	9	0.232064		0.198607	0.265521
Pigeon guillemot	Air	pigeon_perp3second	Pigeon guillemotL	Aerial Flight	Fluid	9	0.228875		0.195878	0.261872
Pigeon guillemot	Air	pigeon_perp3third	Pigeon guillemotM	Aerial Flight	Fluid	9	0.215166		0.184145	0.246186
Tufted puffin	Air	Dz91_014	Tufted puffinJ	Aerial Flight	Fluid	27	0.198026		0.169476	0.226576
Tufted puffin	Air	Dz100_070	Tufted puffinK	Aerial Flight	Fluid	15	0.220291		0.188531	0.25205
Tufted puffin	Air	Dz100_071	Tufted puffinL	Aerial Flight	Fluid	7	0.193294		0.165427	0.221162
Tufted puffin	Air	Dz100_080	Tufted puffinM	Aerial Flight	Fluid	37	0.188957		0.161715	0.216199
Common murre	Air	Dz100_064_eighthbird	Common murreJ	Aerial Flight	Ground	14	0.1946	0.0118597	0.18274	0.20646
Common murre	Air	Dz100_064_firstbird	Common murreK	Aerial Flight	Ground	45	0.1727	0.011	0.1617	0.1837
Common murre	Air	Dz100_064_secondbird	Common murreL	Aerial Flight	Ground	43	0.1459	0.0139113	0.131989	0.159811
Common murre	Air	Dz100_064_seventhbird	Common murreM	Aerial Flight	Ground	13	0.1726	0.0105201	0.16208	0.18312
Common murre	Air	Dz100_064_thirdfrontbird	Common murreN	Aerial Flight	Ground	19	0.159	0.00977008	0.14923	0.16877
Horned puffin	Air	Dz91_079	Horned puffinJ	Aerial Flight	Ground	12	0.1444	0.00837377	0.136026	0.152774
Horned puffin	Air	Dz91_081	Horned puffinK	Aerial Flight	Ground	24	0.2579	0.00740046	0.2505	0.2653
Horned puffin	Air	Dz91_082	Horned puffinL	Aerial Flight	Ground	26	0.4618	0.0204646	0.441335	0.482265
Horned puffin	Air	Dz91_0119	Horned puffinM	Aerial Flight	Ground	45	0.3951	0.0191132	0.375987	0.414213
Pigeon guillemot	Air	pigeon_perp1	Pigeon guillemotI	Aerial Flight	Ground	7	0.4468	0.0473251	0.399475	0.494125
Pigeon guillemot	Air	pigeon_perp4	Pigeon guillemotJ	Aerial Flight	Ground	4	0.4066	0.0230591	0.383541	0.429659
Pigeon guillemot	Air	pigeon_perp3first	Pigeon guillemotK	Aerial Flight	Ground	9	0.4961	0.0350698	0.46103	0.53117
Pigeon guillemot	Air	pigeon_perp3second	Pigeon guillemotL	Aerial Flight	Ground	9	0.5724	0.0232116	0.549188	0.595612
Pigeon guillemot	Air	pigeon_perp3third	Pigeon guillemotM	Aerial Flight	Ground	9	0.5135	0.0217698	0.49173	0.53527
Tufted puffin	Air	Dz91_014	Tufted puffinJ	Aerial Flight	Ground	27	0.2571	0.0240453	0.233055	0.281145
Tufted puffin	Air	Dz100_070	Tufted puffinK	Aerial Flight	Ground	15	0.2932	0.0191977	0.274002	0.312398
Tufted puffin	Air	Dz100_071	Tufted puffinL	Aerial Flight	Ground	7	0.2788	0.017998	0.260802	0.296798
Tufted puffin	Air	Dz100_080	Tufted puffinM	Aerial Flight	Ground	37	0.245	0.0125315	0.232469	0.257531

## Sheet: Metadata
Lapsansky, Zatz, and Tobalske (2020) eLife
This excel sheet contains the data for plotting Figure 2 using the MatLab script labeled "…DataVisualization"
See details in the methods for the calculation of strouhal number based on fluid velocity and that based on ground speed, especially for air.
The mean strouhal number for aerial flights based on fluid velocity are simply dummy values. Those points are deleted in the final figure.
Species	Fluid	run	tag	type	velocityReference	NumberofWingbeats	strouhal	strouhal_sd	st_lowerBound	st_upperBound
		Actual name of the run, for reference purposes	Placeholder run name so that the data are plotted nicely.	Horizontal swimming, descending swimming, or aerial flight	Whether the velocity used for calculating strouhal number is based on the fluid velocity or the ground velocity.	Number of wingbeats used in calculating that strouhal number	Calculated strouhal number for that run. Note that for aerial flights based on fluid velocity these are just dummy values!	Standard deviation in the strouhal number, propagated from the standard deviation in wingbeat amplitude. Not included for aerial flights based on fluid velocity. See methods for details.	Strouhal minus standard deviation in strouhal, except for aerial flights based on fluid velocity, where this is simply the strouhal number calculated using the higher cruising flight speed of the species based on Spear and Ainley (1997)	Strouhal plus standard deviation in strouhal, except for aerial flights based on fluid velocity, where this is simply the strouhal number calculated using the higher cruising flight speed of the species based on Spear and Ainley (1997)
