# Supplementary material for: Alcids ‘fly’ at efficient Strouhal numbers in both air and water but vary stroke velocity and angle
Source: eLife. 2020 Jun 30;9:e55774. doi: 10.7554/eLife.55774 (PMC7332295; doi:10.7554/eLife.55774)
Supplement: Figure 3—source data 1. [file elife-55774-fig3-data1.xlsx]

## Sheet: data
Species	Fluid	downstrokeVelocity	upstrokeVelocity	# of Wingbeats
Common murre	Air	861.456	861.456	9
Common murre	Air	824.819	824.819	11
Common murre	Air	1031.28	1031.28	11
Common murre	Air	920.953	920.953	12
Common murre	Air	1069.02	1069.02	12
Common murre	Air	1083.91	1083.91	13
Common murre	Air	956.859	956.859	11
Common murre	Air	954.78	954.78	13
Common murre	Air	1021.63	1021.63	11
Common murre	Air	1013.66	1013.66	10
Common murre	Water	589.219	364.244	2.5
Common murre	Water	759.182	583.274	4
Common murre	Water	629.4	609.313	5
Common murre	Water	545.054	473.805	7
Common murre	Water	370.611	199.665	6
Common murre	Water	748.467	355.978	2
Common murre	Water	663.521	354.091	2.5
Common murre	Water	655.615	623.892	11
Common murre	Water	556.634	330.674	3.5
Common murre	Water	495.952	432.742	4
Horned puffin	Air	1041.83	1041.83	14
Horned puffin	Air	1070.84	1070.84	13
Horned puffin	Air	953.886	953.886	8
Horned puffin	Air	953.721	953.721	14
Horned puffin	Air	1269.7	1269.7	13
Horned puffin	Air	1180.27	1180.27	13
Horned puffin	Air	1233.35	1233.35	16
Horned puffin	Air	1005.46	1005.46	18
Horned puffin	Air	1101.88	1101.88	16
Horned puffin	Air	1243.68	1243.68	17
Horned puffin	Air	1139.28	1139.28	18
Horned puffin	Water	501.271	348.401	4
Horned puffin	Water	714.866	472.082	6
Horned puffin	Water	496.662	353.356	8
Horned puffin	Water	714.866	472.082	6
Horned puffin	Water	424.426	389.191	10
Horned puffin	Water	524.513	546.901	7
Horned puffin	Water	654.273	358.795	4
Horned puffin	Water	610.483	367.602	3
Horned puffin	Water	573.501	220.159	4
Horned puffin	Water	504.465	296.744	3.5
Pigeon guillemot	Air	1423.18	1423.18	10
Pigeon guillemot	Air	1571.87	1571.87	7
Pigeon guillemot	Air	1276.86	1276.86	5
Pigeon guillemot	Air	1493.83	1493.83	7
Pigeon guillemot	Air	1969.16	1969.16	6
Pigeon guillemot	Air	1642.37	1642.37	7
Pigeon guillemot	Air	1720.27	1720.27	6
Pigeon guillemot	Air	1485.82	1485.82	8
Pigeon guillemot	Air	2775.61	2775.61	7
Pigeon guillemot	Air	3207.4	3207.4	7
Pigeon guillemot	Water	621.251	576.418	4
Pigeon guillemot	Water	557.246	388.275	11
Pigeon guillemot	Water	559.412	395.344	10
Pigeon guillemot	Water	490.727	513.237	11
Pigeon guillemot	Water	725.311	518.502	7.5
Pigeon guillemot	Water	690.273	430.683	5
Pigeon guillemot	Water	531.55	468.395	4
Pigeon guillemot	Water	611.922	552.43	3
Pigeon guillemot	Water	659.704	463.428	5
Pigeon guillemot	Water	837.393	498.741	3.5
Tufted puffin	Air	1020.78	1020.78	10
Tufted puffin	Air	1108.78	1108.78	16
Tufted puffin	Air	1116.02	1116.02	17
Tufted puffin	Air	1164.62	1164.62	15
Tufted puffin	Air	1153.73	1153.73	17
Tufted puffin	Air	1100.24	1100.24	16
Tufted puffin	Air	1152.99	1152.99	17
Tufted puffin	Air	1200.8	1200.8	15
Tufted puffin	Air	1061.48	1061.48	15
Tufted puffin	Water	555.174	434.477	11.5
Tufted puffin	Water	418.221	184.358	4.5
Tufted puffin	Water	469.495	266.552	4
Tufted puffin	Water	511.015	332.16	8
Tufted puffin	Water	452.501	394.91	4
Tufted puffin	Water	441.973	313.209	4
Tufted puffin	Water	444.48	275.884	2
Tufted puffin	Water	467.663	251.369	4
Tufted puffin	Water	458.1	211.698	3
Tufted puffin	Water	577.667	350.101	7

## Sheet: Metadata
Lapsansky, Zatz, and Tobalske (2020) eLife
This excel sheet contains the data for plotting Figure 3 using the MatLab script labeled "…DataVisualization"
Species	Fluid	downstrokeVelocity	upstrokeVelocity	# of Wingbeats
		Average velocity of the downstrokes (in degrees per second)	Average velocity of the upstrokes (in degrees per second)	Number of wingbeats used to calculate those averages (for book-keeping purposes)
