# Supplementary material for: Alcids ‘fly’ at efficient Strouhal numbers in both air and water but vary stroke velocity and angle
Source: eLife. 2020 Jun 30;9:e55774. doi: 10.7554/eLife.55774 (PMC7332295; doi:10.7554/eLife.55774)
Supplement: Figure 5—source data 1. [file elife-55774-fig5-data1.xlsx]

## Sheet: allData
descentAngle	Species	fluid	tag	type	numberOfWingbeats	strokeAngle	speciesAverage
37	Horned puffin	water	100L	descending	2	75.1082	88.5516
38	Horned puffin	water	133R	descending	3	97.664
21	Horned puffin	water	91R	descending	5	92.8825
24	Common murre	water	96R	descending	3	90.9675	78.5771
31	Common murre	water	124L	descending	6	66.1868
53	Pigeon guillemot	water	28L	descending	3	95.7606	95.5273
25	Pigeon guillemot	water	136L	descending	2	92.3066
10	Pigeon guillemot	water	136R	descending	3	98.5147
49	Tufted puffin	water	51R	descending	3	104.53	104.713
20	Tufted puffin	water	120R	descending	3	106.504
36	Tufted puffin	water	136R	descending	6	103.105
0	Horned puffin	water	100R	level	5	92.6736	93.8534
0	Horned puffin	water	113L	level	4	89.3212
0	Horned puffin	water	148_2650	level	3	96.9981
0	Horned puffin	water	148_7210	level	6	96.0041
0	Horned puffin	water	23R	level	4	92.2724
0	Horned puffin	water	88R	level	2	95.8511
0	Common murre	water	110R.1700	level	4	90.6997	95.7484
0	Common murre	water	110R_1750	level	4	102.514
0	Common murre	water	24R13075	level	3	106.646
0	Common murre	water	24R5485	level	3	98.9378
0	Common murre	water	29L	level	2	91.1887
0	Common murre	water	29R	level	4	87.7411
0	Common murre	water	30L	level	4	92.5111
0	Pigeon guillemot	water	100R	level	5	81.3423	87.0442
0	Pigeon guillemot	water	125L	level	6	85.2119
0	Pigeon guillemot	water	29R	level	6	88.6499
0	Pigeon guillemot	water	43R	level	4	90.525
0	Pigeon guillemot	water	44R	level	5	89.4917
0	Tufted puffin	water	14811775v	level	4	83.6684	91.2678
0	Tufted puffin	water	149v	level	4	102.569
0	Tufted puffin	water	20L_11360v	level	4	75.926
0	Tufted puffin	water	20L	level	4	86.1852
0	Tufted puffin	water	42R	level	4	94.4084
0	Tufted puffin	water	95L	level	5	104.849
0	Horned puffin	air	91-119v	aerial	46	74.73	79.6693
0	Horned puffin	air	91-082v	aerial	27	70.8881
0	Horned puffin	air	91-079v	aerial	13	88.9764
0	Horned puffin	air	91_081V	aerial	25	84.0827
0	Common murre	air	eighth_bird	aerial	14	80.4721	84.8697
0	Common murre	air	first_bird	aerial	45	83.3825
0	Common murre	air	second_bird	aerial	43	88.3907
0	Common murre	air	third_bird	aerial	20	88.2758
0	Common murre	air	seventh_bird	aerial	14	83.8273
0	Tufted puffin	air	91_014v	aerial	28	82.8584	81.0146
0	Tufted puffin	air	100-070v	aerial	16	80.7579
0	Tufted puffin	air	100-071v	aerial	8	78.2181
0	Tufted puffin	air	100-80v	aerial	37	82.2241
0	Pigeon guillemot	air	perp1_7_	aerial	7	67.5383	73.381
0	Pigeon guillemot	air	perp3_firstbird	aerial	10	71.1709
0	Pigeon guillemot	air	perp3_secondbird	aerial	10	66.2714
0	Pigeon guillemot	air	perp3_thirdbird	aerial	10	76.7722
0	Pigeon guillemot	air	perp4_	aerial	4	85.1523

## Sheet: aquaticData
descentAngle	Species	fluid	tag	type	numberOfWingbeats	strokeAngle	speciesAverage
37	Horned puffin	water	100L	descending	2	75.1082	88.5516
38	Horned puffin	water	133R	descending	3	97.664
21	Horned puffin	water	91R	descending	5	92.8825
24	Common murre	water	96R	descending	3	90.9675	78.5771
31	Common murre	water	124L	descending	6	66.1868
53	Pigeon guillemot	water	28L	descending	3	95.7606	95.5273
25	Pigeon guillemot	water	136L	descending	2	92.3066
40	Pigeon guillemot	water	136R	descending	3	98.5147
49	Tufted puffin	water	51R	descending	3	104.53	104.713
20	Tufted puffin	water	120R	descending	3	106.504
36	Tufted puffin	water	136R	descending	6	103.105
0	Horned puffin	water	100R	level	5	92.6736	93.8534
0	Horned puffin	water	113L	level	4	89.3212
0	Horned puffin	water	148_2650	level	3	96.9981
0	Horned puffin	water	148_7210	level	6	96.0041
0	Horned puffin	water	23R	level	4	92.2724
0	Horned puffin	water	88R	level	2	95.8511
0	Common murre	water	110R.1700	level	4	90.6997	95.7484
0	Common murre	water	110R_1750	level	4	102.514
0	Common murre	water	24R13075	level	3	106.646
0	Common murre	water	24R5485	level	3	98.9378
0	Common murre	water	29L	level	2	91.1887
0	Common murre	water	29R	level	4	87.7411
0	Common murre	water	30L	level	4	92.5111
0	Pigeon guillemot	water	100R	level	5	81.3423	87.0442
0	Pigeon guillemot	water	125L	level	6	85.2119
0	Pigeon guillemot	water	29R	level	6	88.6499
0	Pigeon guillemot	water	43R	level	4	90.525
0	Pigeon guillemot	water	44R	level	5	89.4917
0	Tufted puffin	water	14811775v	level	4	83.6684	91.2678
0	Tufted puffin	water	149v	level	4	102.569
0	Tufted puffin	water	20L_11360v	level	4	75.926
0	Tufted puffin	water	20L	level	4	86.1852
0	Tufted puffin	water	42R	level	4	94.4084
0	Tufted puffin	water	95L	level	5	104.849

## Sheet: Metadata
Lapsansky, Zatz, and Tobalske (2020) eLife
This excel sheet contains the data for plotting Figure 2 using the MatLab script labeled "…DataVisualization"
See details in the methods for the calculation of strouhal number based on fluid velocity and that based on ground speed, especially for air.
The mean strouhal number for aerial flights based on fluid velocity are simply dummy values. Those values are deleted in the final figure.
allData
descentAngle	Species	fluid	tag	type	numberOfWingbeats	strokeAngle	speciesAverage
Angle of descent for that run (deg). Zeros indicate a horizontal flight, for which the bird was interpretted to be traversing the tank with no intentional change in depth.			Identification for reference.	Descending swimming or level swimming or aerial flight.	Number of wingbeats in that run used to calculate the average values reported.	Average stroke angle (deg) for that run.	Average species-specific stroke angle (deg) for reporting purposes.
aquaticData
The same information, simply excluding the aerial data so that statistical tests can be performed to compare horizontal and descending aquatic flight.
