# Supplementary material for: Alcids ‘fly’ at efficient Strouhal numbers in both air and water but vary stroke velocity and angle
Source: eLife. 2020 Jun 30;9:e55774. doi: 10.7554/eLife.55774 (PMC7332295; doi:10.7554/eLife.55774)
Supplement: Figure 6—source data 1. [file elife-55774-fig6-data1.xlsx]

## Sheet: data
Species	Fluid	run	type	descentAngle	upstrokeChordAngle	downstrokeChordAngle
Common murre	Water	24_1	Horizontal Swimming	0	17.0441	23.7977
Common murre	Water	24_2	Horizontal Swimming	0	12.8097	33.7243
Common murre	Water	29_1	Horizontal Swimming	0	11.9825	30.7661
Common murre	Water	29_2	Horizontal Swimming	0	11.8799	41.2096
Common murre	Water	30L	Horizontal Swimming	0	9.76972	36.2667
Common murre	Water	110_1	Horizontal Swimming	0	18.93	26.87
Common murre	Water	110_2	Horizontal Swimming	0	26.9745	28.6317
Horned puffin	Water	23R	Horizontal Swimming	0	26.7904	22.1755
Horned puffin	Water	88R	Horizontal Swimming	0	23.8	34.46
Horned puffin	Water	100R	Horizontal Swimming	0	15.5566	17.3214
Horned puffin	Water	113L	Horizontal Swimming	0	15.7227	28.1441
Horned puffin	Water	148_1	Horizontal Swimming	0	25.4609	20.1188
Horned puffin	Water	148_2	Horizontal Swimming	0	23.0984	17.0279
Pigeon guillemot	Water	29R	Horizontal Swimming	0	14.8932	29.8164
Pigeon guillemot	Water	43R	Horizontal Swimming	0	8.91855	19.5609
Pigeon guillemot	Water	44	Horizontal Swimming	0	12.5635	25.9158
Pigeon guillemot	Water	100	Horizontal Swimming	0	10.0272	19.4911
Pigeon guillemot	Water	125	Horizontal Swimming	0	14.9395	20.8182
Tufted puffin	Water	20_1	Horizontal Swimming	0	22.9193	23.785
Tufted puffin	Water	20_2	Horizontal Swimming	0	21.6741	6.65984
Tufted puffin	Water	42	Horizontal Swimming	0	29.8263	6.2208
Tufted puffin	Water	95	Horizontal Swimming	0	25.2523	7.22928
Tufted puffin	Water	148_1	Horizontal Swimming	0	25.2551	8.59253
Tufted puffin	Water	149	Horizontal Swimming	0	22.1256	19.2503
Common murre	Water	96	zDescending Swimming	24	26.9238	26.7536
Common murre	Water	124	zDescending Swimming	31	30.0522	12.2877
Horned puffin	Water	91R	zDescending Swimming	21	34.6039	18.9143
Horned puffin	Water	100	zDescending Swimming	37	31.9514	19.3392
Horned puffin	Water	133	zDescending Swimming	38	36.8157	28.4177
Pigeon guillemot	Water	28	zDescending Swimming	53	28.4022	43.1723
Pigeon guillemot	Water	136L	zDescending Swimming	25	24.6406	18.4069
Pigeon guillemot	Water	136R	zDescending Swimming	40	35.0568	29.5307
Tufted puffin	Water	51	zDescending Swimming	49	55.6105	40.5113
Tufted puffin	Water	120	zDescending Swimming	20	31.1596	46.9568
Tufted puffin	Water	136	zDescending Swimming	36	39.091	46.4776

## Sheet: Metadata
Lapsansky, Zatz, and Tobalske (2020) eLife
This excel sheet contains the data for plotting Figure 6 using the MatLab script labeled "…DataVisualization"
See details in the methods for the calculation of chord angle.
Species	Fluid	run	type	descentAngle	upstrokeChordAngle	downstrokeChordAngle
		Unique identifier for organization purposed	Horizontal or Descending swimming. The z is added before the descending swimming so that the legend orders the points properly	Angle of descent (deg) for that run	The average chord angle (deg) for that run at mid-upstroke. This value was calculated with the excel file containing the digitized points and simply averaged.	The average chord angle (deg) for that run at mid-downstroke. This value was calculated with the excel file containing the digitized points and simply averaged.
